# Supplementary material
Source: PubMed Central journal article supplement (PMC7811882)
Supplement: NIHMS113355-supplement-SI.pdf [file NIHMS113355-supplement-SI.pdf]

*Supporting Information for:*

# Using Enantioselective Indicator Displacement Assays to Determine the Enantiomeric Excess of $\alpha$ -Amino Acids

Diana Leung,\* J. Frantz Folmer-Andersen,<sup>‡</sup> Vincent M. Lynch,\* and Eric V. Anslyn\*

Department of Chemistry and Biochemistry, The University of Texas at Austin, 1 University Station  
A5200, Austin, TX 78712

<sup>‡</sup>Institut de Science et d'Ingénierie Supramoléculaires. 8 Allée Gaspard Monge, BP 70028, 67083  
Strasbourg (France)

anslyn@ccwf.cc.utexas.edu

## **Table of Contents:**

### **I) *Experimental Details on:***

a) UV-vis Titrations on Receptor [Cu<sup>II</sup>((R,R)-**1**)]<sup>2+</sup>

b) UV-vis Titrations on Receptor [Cu<sup>II</sup>((R,R)-**2**)]<sup>2+</sup>

c) UV-vis Spectrophotometer Analysis: Enantiomeric Excess Calibration Curves using Receptor  
[Cu<sup>II</sup>((R,R)-**1**)]<sup>2+</sup>

d) UV-vis Spectrophotometer Analysis: Enantiomeric Excess Calibration Curves using Receptor  
[Cu<sup>II</sup>((R,R)-**2**)]<sup>2+</sup>

e) UV-vis Spectrophotometer Analysis of Test Samples using Receptor [Cu<sup>II</sup>((R,R)-**1**)]<sup>2+</sup>

f) UV-vis Spectrophotometer Analysis of Test Samples using Receptor [Cu<sup>II</sup>((R,R)-**2**)]<sup>2+</sup>

## **II) Figures:**

a) Displacement Isotherms using Receptor  $[\text{Cu}^{\text{II}}((R,R)\text{-1})]^{2+}$  **Figure S-1**

b) Displacement Isotherms using Receptor  $[\text{Cu}^{\text{II}}((R,R)\text{-2})]^{2+}$  **Figure S-2**

c) Enantiomeric Excess Calibration Curves using Receptor  $[\text{Cu}^{\text{II}}((R,R)\text{-1})]^{2+}$  on a UV-vis Spectrophotometer **Figure S-3**

d) Enantiomeric Excess Calibration Curves using Receptor  $[\text{Cu}^{\text{II}}((R,R)\text{-2})]^{2+}$  on a UV-vis Spectrophotometer **Figure S-4**

## **III) Tables:**

a) Concentrations of Amino Acids used in UV-vis Displacement Isotherms using Receptor  $[\text{Cu}^{\text{II}}((R,R)\text{-1})]^{2+}$  **Table S-1**

b) Concentrations of Amino Acids used in UV-vis Displacement Isotherms using Receptor  $[\text{Cu}^{\text{II}}((R,R)\text{-2})]^{2+}$  **Table S-2**

c) Concentrations used for Enantiomeric Excess Calibration Curves using Receptor  $[\text{Cu}^{\text{II}}((R,R)\text{-1})]^{2+}$  **Table S-3**

d) Concentrations used for Enantiomeric Excess Calibration Curves using Receptor  $[\text{Cu}^{\text{II}}((R,R)\text{-2})]^{2+}$  **Table S-4**

e) Test Samples Analyzed on a UV-vis Spectrophotometer using Receptor  $[\text{Cu}^{\text{II}}((R,R)\text{-1})]^{2+}$  **Table S-5**

f) Test Samples Analyzed on a UV-vis Spectrophotometer using Receptor  $[\text{Cu}^{\text{II}}((R,R)\text{-2})]^{2+}$  **Table S-6**

## General Experimental Details:

All commercially obtained reagents were used as received. Purity of commercially available chrome azurol S (**CAS**) is 37.5%. Deionized water was used throughout. All solvents used in spectrophotometric titrations were degassed by sparging with argon for one hour. A Varian Mercury 400 MHz and a Varian Unity 300 MHz NMR spectrometer were used to obtain  $^1\text{H}$  and  $^{13}\text{C}$  NMR spectra, which were referenced using the solvent residual peak. UV-vis spectra were recorded on a Beckman Coulter DU-800 spectrophotometer in a Starna 1 cm 7Q cuvette. All titrations and enantiomeric excess calibration curves were measured at 25°C in a 1:1 MeOH:H<sub>2</sub>O solution, buffered to pH 7.5 with 50 mM HEPES. Ligands (*R,R*)-**1** and (*S,S*)-**1** were synthesized according to a published procedure.<sup>1</sup> Ligands (*R,R*)-**2** and (*S,S*)-**2** were synthesized according to a published procedure.<sup>2</sup>

*Buffer.* Degassed MeOH and H<sub>2</sub>O were obtained by sparging with argon gas for 1 h. 4-(2-hydroxyethyl)-1-piperazineethanesulfonic acid (HEPES; 11.915 g, 50 mmol) was dissolved in MeOH:H<sub>2</sub>O (1:1, 800 mL). The pH of the solution was adjusted to 7.5 with NaOH (2 M). The solution was filtered and diluted to 1 L with 1:1 MeOH:H<sub>2</sub>O.

### I) *Experimental Details on:*

#### a) *UV-vis Titrations using Receptor [Cu<sup>II</sup>((*R,R*)-**1**)]<sup>2+</sup>.*

*Stock solutions for UV-vis Spectroscopy Analysis.* (*R,R*)-**1** (2.6934 g, 6.50 mmol) was dissolved into 50 mL in MeOH to give a 130 mM stock solution. Cu(OTf)<sub>2</sub> (54.25 mg, 0.15 mmol) was diluted to 5 mL in H<sub>2</sub>O to give a 30 mM stock solution. **CAS** (47 mg, 29.12 μmol, 37.5%) was dissolved into 10 mL of 1:1 MeOH:H<sub>2</sub>O, buffered to pH 7.5 with 50 mM HEPES, to give a 2.912 mM stock solution. All amino acid stock solutions were prepared with 1:1 MeOH:H<sub>2</sub>O, buffered to pH 7.5 with 50 mM HEPES.

*Displacement Isotherms.* In a separate solution, stock solution of **CAS** (7 μL, 10 μM), stock solution of Cu(OTf)<sub>2</sub> (13 μL, 200 μM), and stock solution of (*R,R*)-**1** (37 μL, 2.5 mM) were mixed and diluted to

2 mL with buffered 1:1 MeOH:H<sub>2</sub>O, to give solution **A**. In a separate solution, stock solution of **CAS** (7 μL, 10 μM), stock solution of Cu(OTf)<sub>2</sub> (13 μL, 200 μM), stock solution of (*R,R*)-**1** (37 μL, 2.5 mM), and L-amino acid (different concentrations of amino acids were used, refer to **Table S-1**) were mixed and diluted to 2 mL with buffered 1:1 MeOH:H<sub>2</sub>O, to give the L-titrant **A**. In a separate solution, stock solution of **CAS** (7 μL, 10 μM), stock solution of Cu(OTf)<sub>2</sub> (13 μL, 200 μM), stock solution of (*R,R*)-**1** (37 μL, 2.5 mM), and D-amino acid (different concentrations of amino acids were used, refer to **Table S-1**) were mixed and diluted to 2 mL with buffered 1:1 MeOH:H<sub>2</sub>O, to give the D-titrant **A**. L-titrant **A** was titrated into a cuvette containing solution **A** (600 μL) and absorbance measurements were taken from 300 – 900 nm on a UV-vis spectrophotometer, affording the displacement isotherm measurements at 602 nm for the L-amino acid. D-titrant **A** was analogously titrated.

**b) UV-vis Titrations using Receptor [Cu<sup>II</sup>((*R,R*)-**2**)]<sup>2+</sup>.**

*Stock solutions for UV-vis Spectroscopy Analysis.* (*R,R*)-**2** (2.6215 g, 9.767 mmol) was dissolved in 25 mL in MeOH to give a 390 mM stock solution. The same stock solutions of **CAS**, and Cu(OTf)<sub>2</sub> were used as above.

*Displacement Isotherms.* In a separate solution, stock solution of **CAS** (7 μL, 10 μM), stock solution of Cu(OTf)<sub>2</sub> (7 μL, 105 μM), and stock solution of (*R,R*)-**2** (45 μL, 8.8 mM) were mixed and diluted to 2 mL with buffered 1:1 MeOH:H<sub>2</sub>O, to give solution **B**. In a separate solution, stock solution of **CAS** (7 μL, 10 μM), stock solution of Cu(OTf)<sub>2</sub> (7 μL, 105 μM), stock solution of (*R,R*)-**2** (45 μL, 8.8 mM), and L-amino acid (different concentrations of amino acids were used, refer to **Table S-2**) were mixed and diluted to 2 mL with buffered 1:1 MeOH:H<sub>2</sub>O, to give the L-titrant **B**. In a separate solution, stock solution of **CAS** (7 μL, 10 μM), stock solution of Cu(OTf)<sub>2</sub> (7 μL, 105 μM), stock solution of (*R,R*)-**2** (45 μL, 8.8 mM), and D-amino acid (different concentrations of amino acids were used, refer to **Table S-2**) were mixed and diluted to 2 mL with buffered 1:1 MeOH:H<sub>2</sub>O, to give the D-titrant **B**. L-titrant **B** was titrated into a cuvette containing solution **B** (600 μL) and absorbance measurements were

taken from 300 – 900 nm on a UV-vis spectrophotometer, affording the displacement isotherm measurements for L-amino acid. D-titrant **B** was analogously titrated.

**c) UV-vis Spectrophotometer Analysis: Enantiomeric Excess Calibration Curves using Receptor  $[Cu^{II}((R,R)-1)]^{2+}$ .**

In a separate solution, stock solution of **CAS** (7  $\mu$ L, 10  $\mu$ M), stock solution of  $Cu(OTf)_2$  (13  $\mu$ L, 200  $\mu$ M), stock solution of  $(R,R)$ -**1** (37  $\mu$ L, 2.5 mM), and L-amino acid (different concentrations of amino acids were used, refer to **Table S-3**) were mixed and diluted to 2 mL with buffered 1:1 MeOH:H<sub>2</sub>O, to give the L-titrant **C**. In a separate solution, stock solution of **CAS** (7  $\mu$ L, 10  $\mu$ M), stock solution of  $Cu(OTf)_2$  (13  $\mu$ L, 200  $\mu$ M), stock solution of  $(R,R)$ -**1** (37  $\mu$ L, 2.5 mM), and D-amino acid (different concentrations of amino acids were used, refer to **Table S-3**) were mixed and diluted to 2 mL with buffered 1:1 MeOH:H<sub>2</sub>O, to give the D-titrant **C**. L-titrant **C** was titrated into a cuvette containing D-titrant **C** (600  $\mu$ L) and absorbance measurements were taken from 300 – 900 nm on a UV-vis spectrophotometer, affording the absorbance for *ee* calibration points at 602 nm for –100% to 0% *ee*. D-titrant **C** was titrated into a cuvette containing L-titrant **C** (600  $\mu$ L) and absorbance measurements were taken from 300 – 900 nm on a UV-vis spectrophotometer, affording the absorbance for *ee* calibration points at 602 nm for 0% to 100% *ee*.

**d) UV-vis Spectrophotometer Analysis: Enantiomeric Excess Calibration Curves using Receptor  $[Cu^{II}((R,R)-2)]^{2+}$ .**

In a separate solution, stock solution of **CAS** (7  $\mu$ L, 10  $\mu$ M), stock solution of  $Cu(OTf)_2$  (7  $\mu$ L, 105  $\mu$ M), stock solution of  $(R,R)$ -**2** (45  $\mu$ L, 8.8 mM), and L-amino acid (different concentrations of amino acids were used, refer to **Table S-4**) were mixed and diluted to 2 mL with buffered 1:1 MeOH:H<sub>2</sub>O, to give the L-titrant **D**. In a separate solution, stock solution of **CAS** (7  $\mu$ L, 10  $\mu$ M), stock solution of  $Cu(OTf)_2$  (7  $\mu$ L, 105  $\mu$ M), stock solution of  $(R,R)$ -**2** (45  $\mu$ L, 8.8 mM), and D-amino acid (different concentrations of amino acids were used, refer to **Table S-4**) were mixed and diluted to

2 mL with buffered 1:1 MeOH:H<sub>2</sub>O, to give the D-titrant **D**. L-titrant **D** was titrated into a cuvette containing D-titrant **D** (600 μL) and absorbance measurements were taken from 300 – 900 nm on a UV-vis spectrophotometer, affording the absorbance for *ee* calibration points at 602 nm for –100% to 0% *ee*. D-titrant **D** was titrated into a cuvette containing L-titrant **D** (600 μL) and absorbance measurements were taken from 300 – 900 nm on a UV-vis spectrophotometer, affording the absorbance for *ee* calibration points at 602 nm for 0% to 100% *ee*.

**e) UV-vis Spectrophotometer Analysis of Test Samples using Receptor [Cu<sup>II</sup>((R,R)-1)]<sup>2+</sup>.**

In a separate solution, stock solution of **CAS** (7 μL, 10 μM), stock solution of Cu(OTf)<sub>2</sub> (13 μL, 200 μM), stock solution of (*R,R*)-**1** (37 μL, 2.5 mM), and a mixture of L- and D-amino acid (different concentrations of amino acids were used, refer to **Table S-3**) were mixed and diluted to 2 mL with buffered 1:1 MeOH:H<sub>2</sub>O, to afford test samples. Absorbance measurements were taken from 300 – 900 nm on a UV-vis spectrophotometer, providing the absorbance at 602 nm for determining *ee* of the test sample using the *ee* calibration curve developed for the specific amino acid (the *ee* of test samples are reported in **Table S-5**).

**f) UV-vis Spectrophotometer Analysis of Test Samples using Receptor [Cu<sup>II</sup>((R,R)-2)]<sup>2+</sup>.**

In a separate solution, stock solution of **CAS** (7 μL, 10 μM), stock solution of Cu(OTf)<sub>2</sub> (7 μL, 105 μM), stock solution of (*R,R*)-**2** (45 μL, 8.8 mM), and a mixture of L- and D-amino acid (different concentrations of amino acids were used, refer to **Table S-4**) were mixed and diluted to 2 mL with buffered 1:1 MeOH:H<sub>2</sub>O, to afford the test samples. Absorbance measurements were taken from 300 – 900 nm on a UV-vis spectrophotometer, providing the absorbance at 602 nm for determining *ee* of the test sample using the *ee* calibration curve developed for the specific amino acid (the *ee* of test samples are reported in **Table S-6**).

## II) Figures:

### a) Displacement Isotherms using Receptor $[Cu^{II}((R,R)-1)]^{2+}$ .

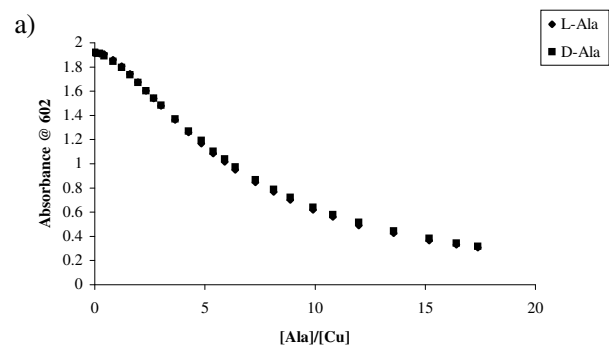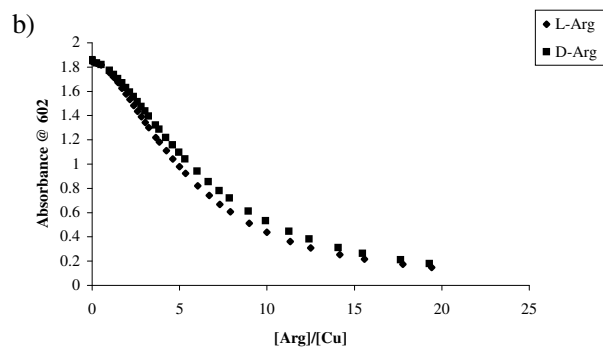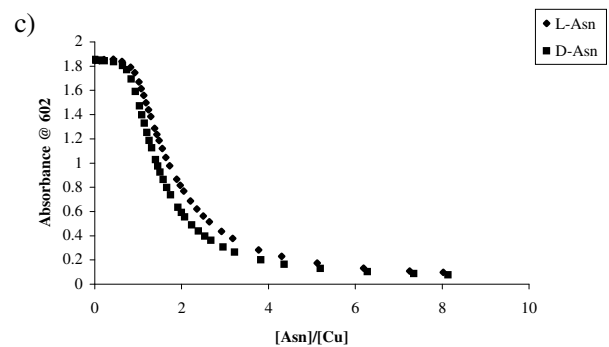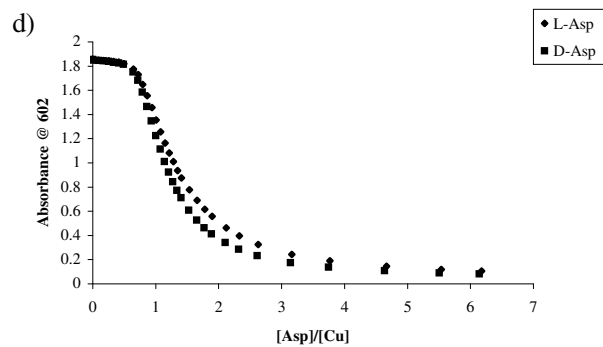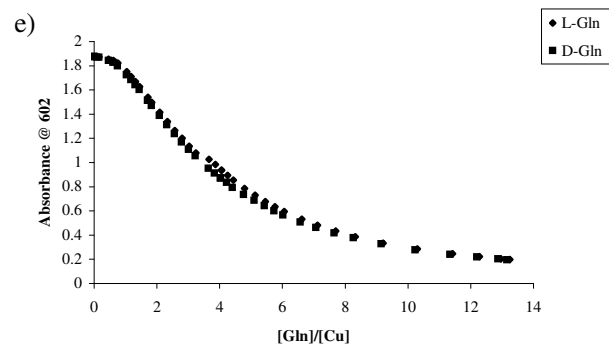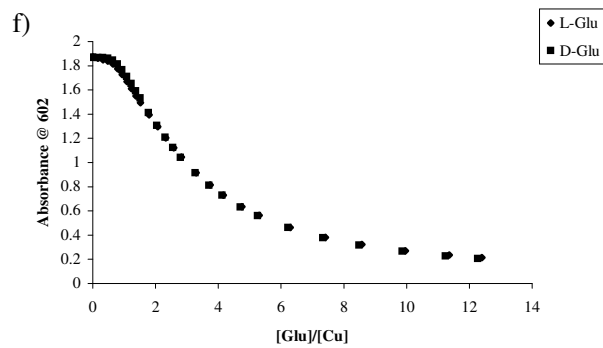

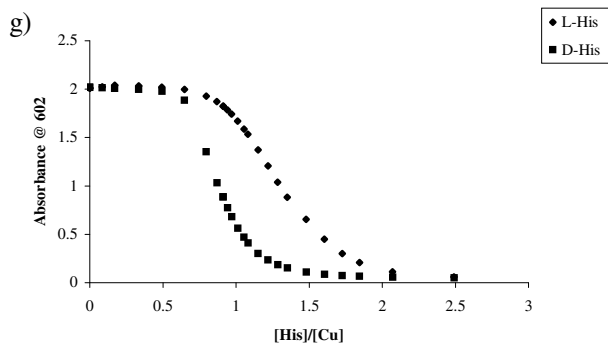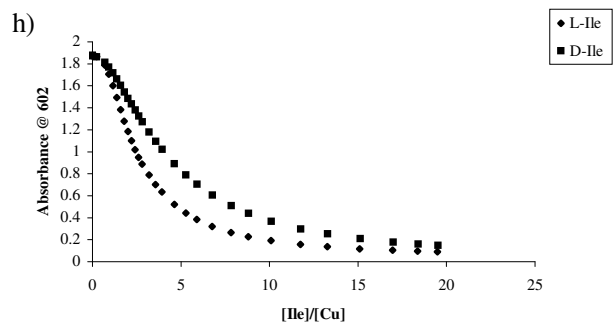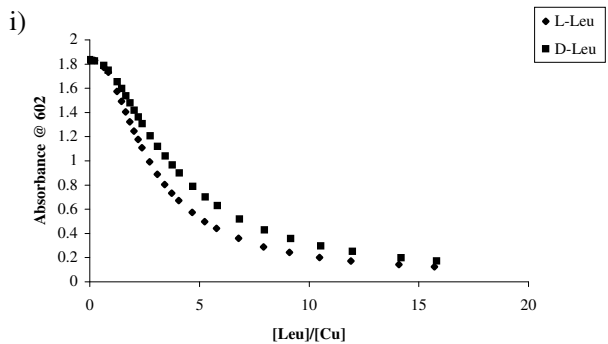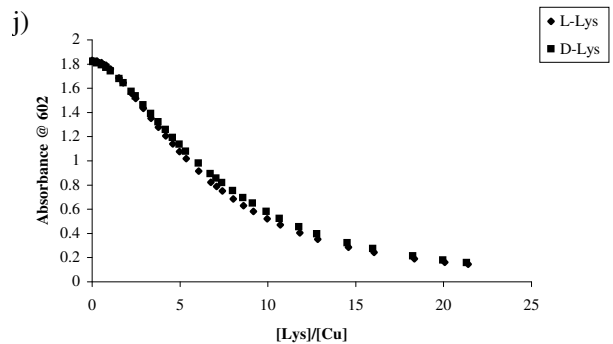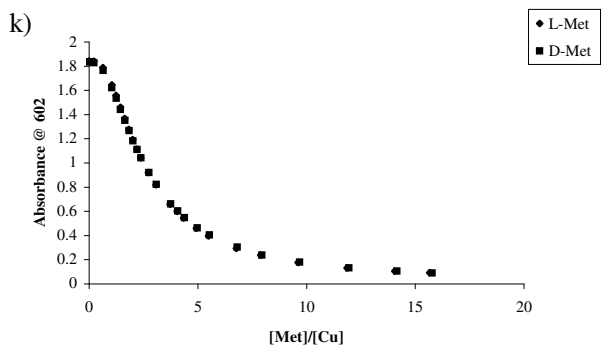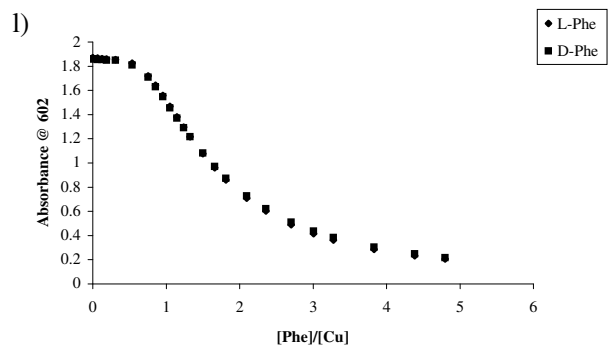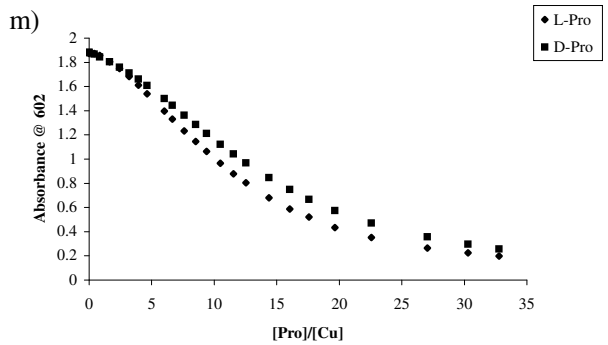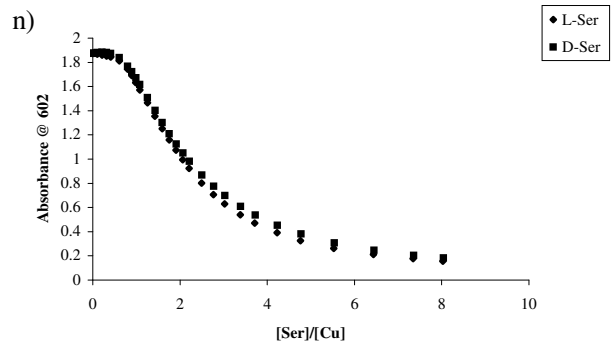



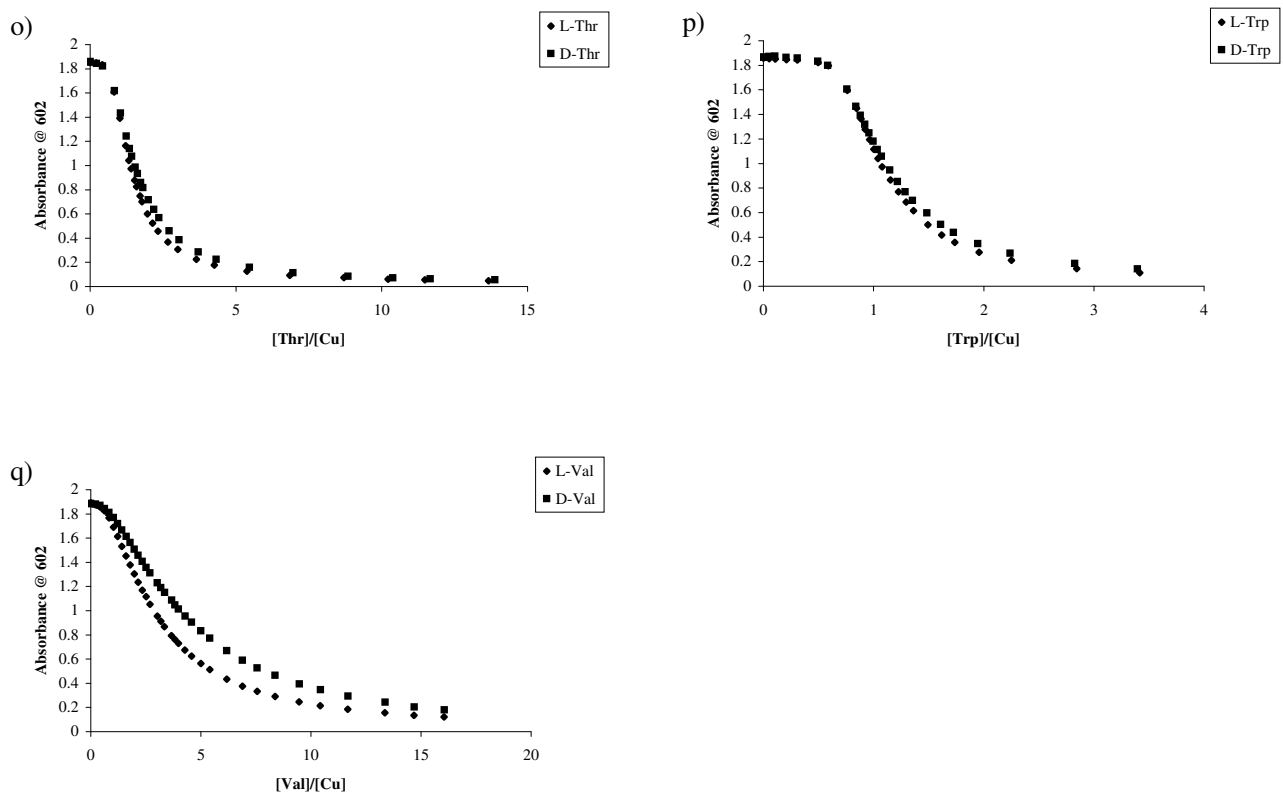

**Figure S-1.** Displacement isotherms at 602 nm measured with a UV-vis spectrophotometer. Displacement isotherms obtained for a solution containing CAS (10  $\mu$ M), Cu(OTf)<sub>2</sub> (200  $\mu$ M) and (*R,R*)-**1** (2.5 mM) in 1:1 MeOH:H<sub>2</sub>O, 50 mM HEPES buffered to pH 7.5 with the addition of: a) L- or D-alanine. b) L- or D-arginine. c) L- or D-asparagine. d) L- or D-aspartate. e) L- or D-glutamine. f) L- or D-glutamate. g) L- or D-histidine. h) L- or D-isoleucine. i) L- or D-leucine. j) L- or D-lysine. k) L- or D-methionine. l) L- or D-phenylalanine. m) L- or D-proline. n) L- or D-serine. o) L- or D-threonine. p) L- or D-tryptophan. q) L- or D-valine. The concentrations of amino acids used are shown in **Table S-1**.

**b) Displacement Isotherms using Receptor  $[Cu^{II}((R,R)-2)]^{2+}$ .**

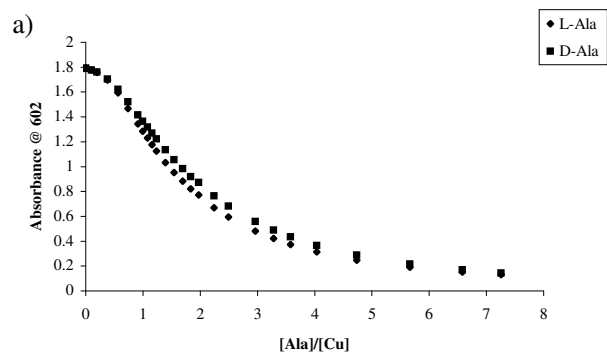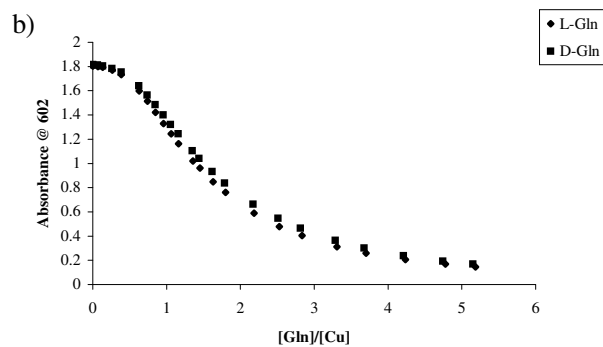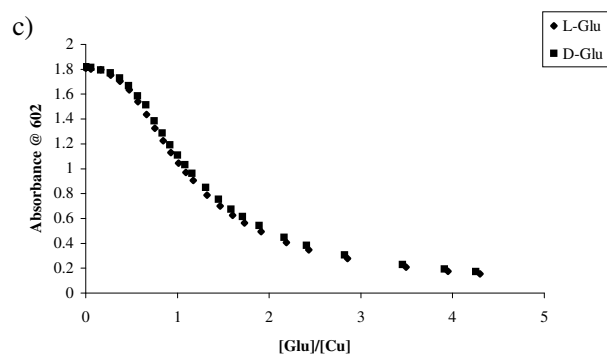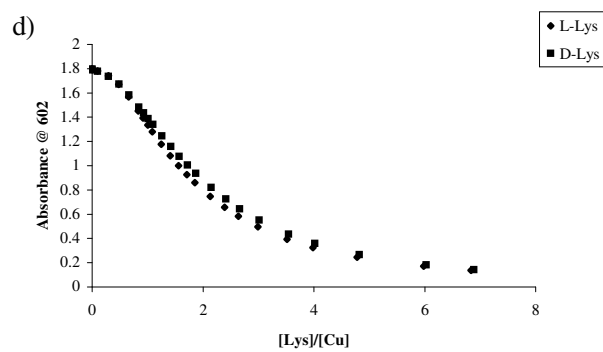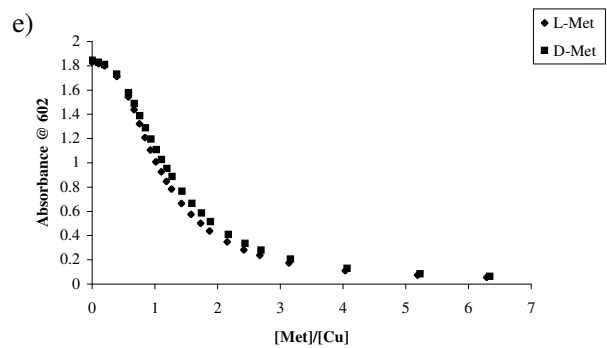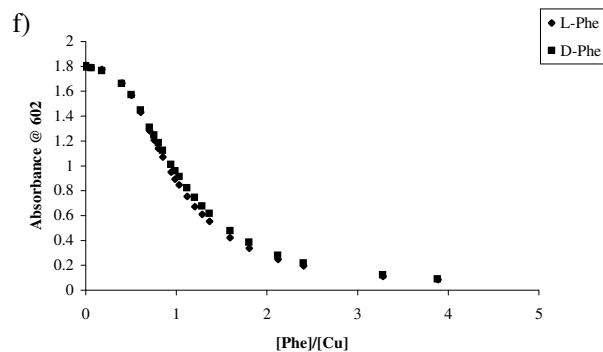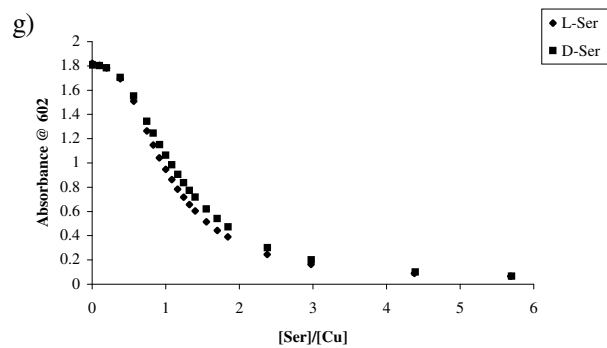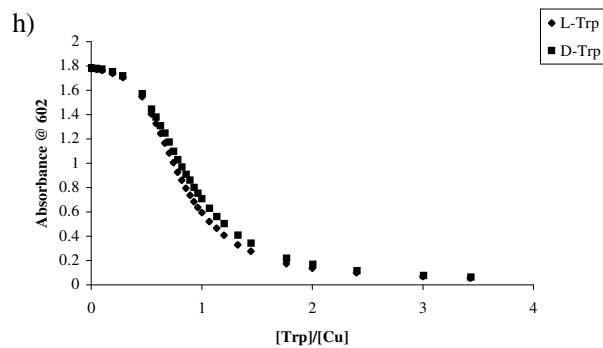

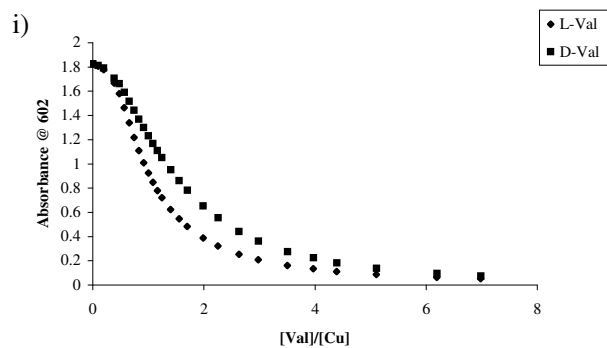

**Figure S-2.** Displacement isotherms at 602 nm measured with a UV-vis spectrophotometer. Displacement isotherms obtained for a solution containing **CAS** (10  $\mu\text{M}$ ),  $\text{Cu}(\text{OTf})_2$  (105  $\mu\text{M}$ ) and **(*R,R*)-2** (8.8 mM) in 1:1 MeOH:H<sub>2</sub>O, 50 mM HEPES buffered to pH 7.5 with the addition of: a) L- or D-alanine. b) L- or D-glutamine. c) L- or D-glutamate. d) L- or D-lysine. e) L- or D-methionine. f) L- or D-phenylalanine. g) L- or D-serine. h) L- or D-tryptophan. i) L- or D-valine. The concentrations of amino acids used are shown in **Table S-2**.

c) *Enantiomeric Excess Calibration Curves using Receptor [Cu<sup>II</sup>((R,R)-1)]<sup>2+</sup> on a UV-vis Spectrophotometer.*

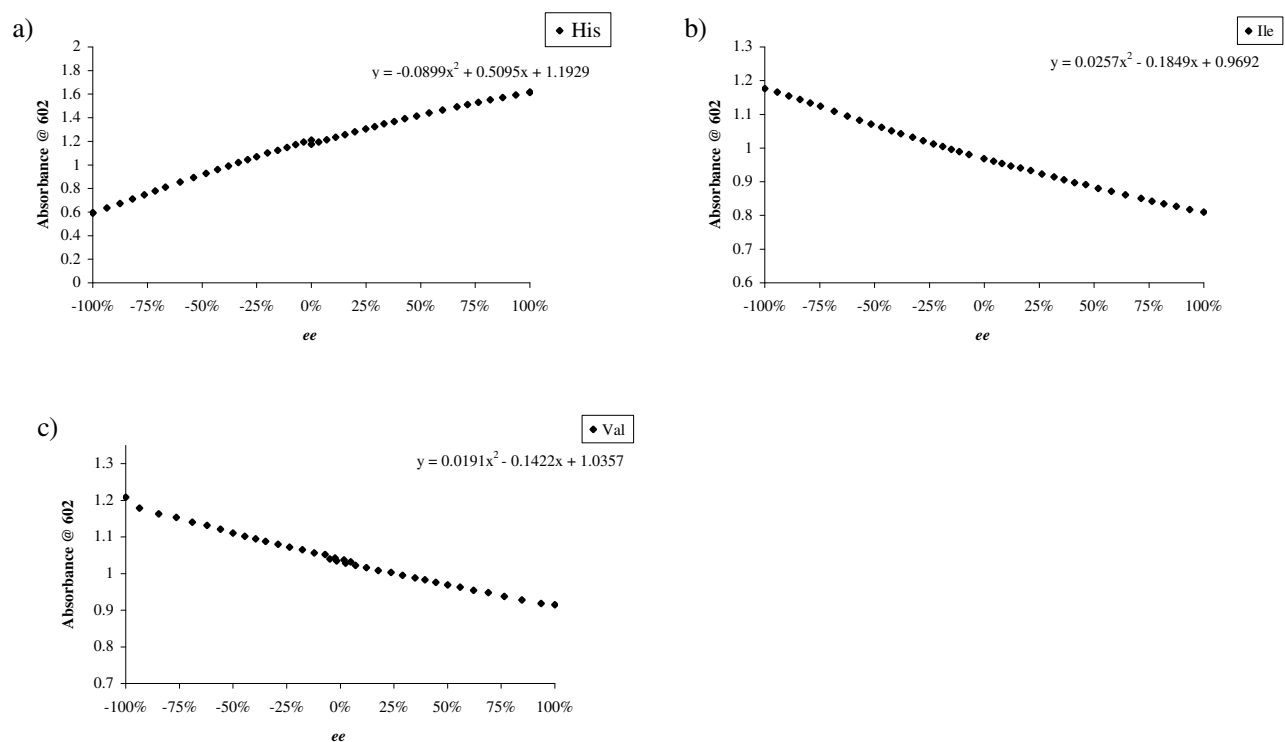

**Figure S-3.** Absorbance at 602 nm as a function of *ee* for displacement experiments measured with a UV-vis spectrophotometer performed in a solution containing CAS (10  $\mu$ M), Cu(OTf)<sub>2</sub> (200  $\mu$ M) and (*R,R*)-**1** (2.5 mM) in 1:1 MeOH:H<sub>2</sub>O, 50 mM HEPES buffered to pH 7.5, with the addition of: a) histidine (202  $\mu$ M). b) isoleucine (697  $\mu$ M). c) valine (714  $\mu$ M).

d) *Enantiomeric Excess Calibration Curves using Receptor [Cu<sup>II</sup>((R,R)-2)]<sup>2+</sup> on a UV-vis Spectrophotometer.*

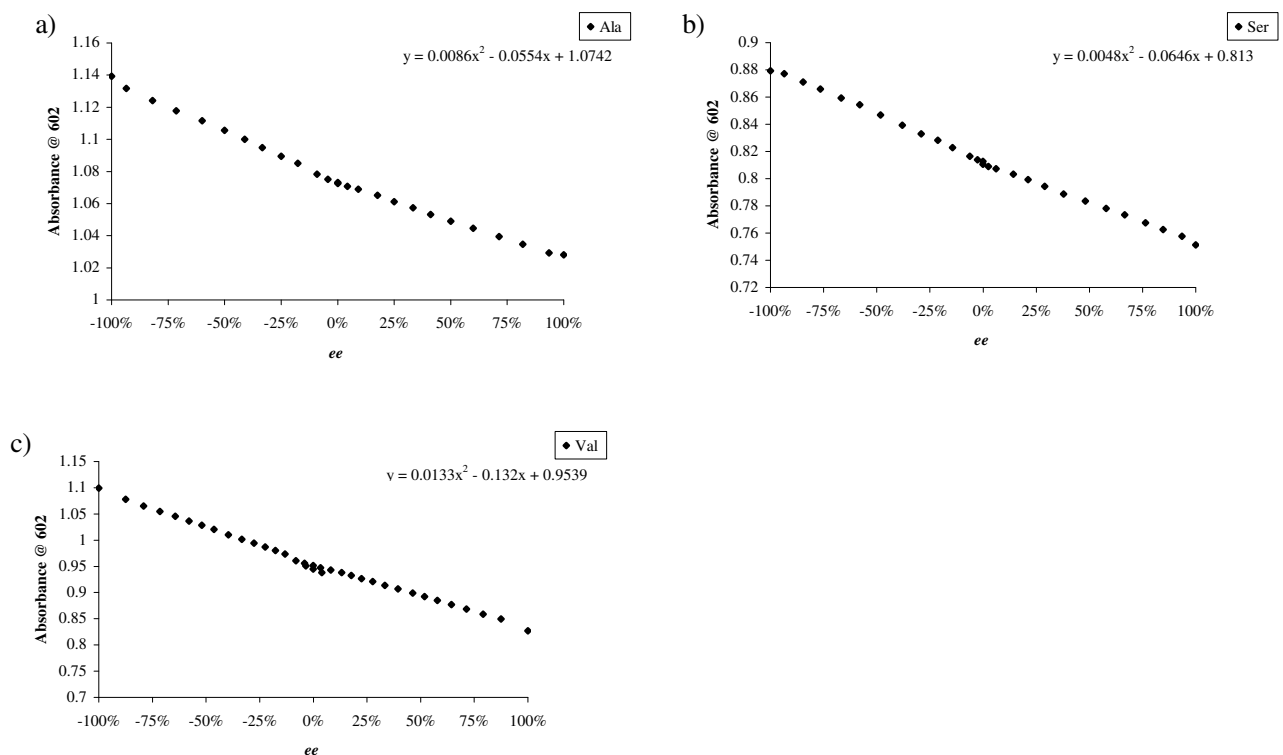

**Figure S-4.** Absorbance at 602 nm as a function of *ee* for displacement experiments measured with a UV-vis spectrophotometer performed in a solution containing CAS (10  $\mu$ M), Cu(OTf)<sub>2</sub> (105  $\mu$ M) and (*R,R*)-**2** (8.8 mM) in 1:1 MeOH:H<sub>2</sub>O, 50 mM HEPES buffered to pH 7.5, with the addition of: a) alanine (149  $\mu$ M). b) serine (125  $\mu$ M). c) valine (125  $\mu$ M).

### III) Tables:

a) *Concentrations of Amino Acids used in UV-vis Displacement Isotherms using Receptor [Cu<sup>II</sup>((R,R)-1)]<sup>2+</sup>.*

**Table S-1.** Concentrations of  $\alpha$ -amino acids used to produce UV-vis displacement isotherms with [Cu<sup>II</sup>((R,R)-1)]<sup>2+</sup>.

| Amino Acids | [L-amino acid] (mM) | [D-amino acid] (mM) |
|-------------|---------------------|---------------------|
| Ala         | 5.00                | 5.00                |
| Arg         | 6.05                | 6.01                |
| Asn         | 2.58                | 2.61                |
| Asp         | 2.01                | 2.00                |
| Gln         | 3.67                | 3.65                |
| Glu         | 3.85                | 3.81                |
| His         | 2.02                | 2.02                |
| Ile         | 5.60                | 5.61                |
| Leu         | 5.11                | 5.14                |
| Lys         | 6.26                | 6.23                |
| Met         | 5.09                | 5.13                |
| Phe         | 1.50                | 1.50                |
| Pro         | 9.96                | 9.96                |
| Ser         | 2.50                | 2.50                |
| Thr         | 4.98                | 5.06                |
| Trp         | 1.26                | 1.26                |
| Val         | 5.01                | 5.01                |

**b) Concentrations of Amino Acids used in UV-vis Displacement Isotherms using Receptor  $[Cu^{II}((R,R)-2)]^{2+}$ .**

**Table S-2.** Concentrations of  $\alpha$ -amino acids used to produce UV-vis displacement isotherms with  $[Cu^{II}((R,R)-2)]^{2+}$ .

| Amino Acids | [L-amino acid] (mM) | [D-amino acid] (mM) |
|-------------|---------------------|---------------------|
| Ala         | 1.24                | 1.24                |
| Gln         | 0.856               | 0.851               |
| Glu         | 0.714               | 0.706               |
| Lys         | 1.26                | 1.27                |
| Met         | 1.27                | 1.28                |
| Phe         | 0.759               | 0.757               |
| Ser         | 1.25                | 1.25                |
| Trp         | 0.631               | 0.632               |
| Val         | 1.25                | 1.25                |

**c) Concentrations used for Enantiomeric Excess Calibration Curves using Receptor  $[Cu^{II}((R,R)-1)]^{2+}$ .**

**Table S-3.** Concentrations of  $\alpha$ -amino acids used to produce *ee* calibration curves using  $[Cu^{II}((R,R)-1)]^{2+}$ .

| Amino Acids | [Amino Acid] (mM) |
|-------------|-------------------|
| His         | 0.202             |
| Ile         | 0.697             |
| Val         | 0.714             |

**d) Concentrations used for Enantiomeric Excess Calibration Curves using Receptor  $[Cu^{II}((R,R)-2)]^{2+}$ .**

**Table S-4.** Concentrations of  $\alpha$ -amino acids used to produce *ee* calibration curves using  $[Cu^{II}((R,R)-2)]^{2+}$ .

| Amino Acids [Amino Acid] (mM) |       |
|-------------------------------|-------|
| Ala                           | 0.149 |
| Ser                           | 0.125 |
| Val                           | 0.125 |

**e) Test Samples Analyzed on a UV-vis Spectrophotometer using Receptor  $[Cu^{II}((R,R)-1)]^{2+}$ .**

**Table S-5.** Enantiomeric excess determination of test samples by analysis using  $[Cu^{II}((R,R)-1)]^{2+}$  through UV-vis measurements.

| Amino Acids <i>ee</i> (Actual) <i>ee</i> (Experimental) <sup>a</sup> |        |        |
|----------------------------------------------------------------------|--------|--------|
| <i>His</i>                                                           |        |        |
| a                                                                    | -25.1% | -20.0% |
| b                                                                    | -50.0% | -67.1% |
| c                                                                    | 75.0%  | 54.7%  |
| d                                                                    | -0.1%  | -9.7%  |
| <i>Ile</i>                                                           |        |        |
| a                                                                    | -57.2% | -56.7% |
| b                                                                    | -21.5% | -14.8% |
| c                                                                    | 42.8%  | 39.4%  |
| d                                                                    | 78.5%  | 90.6%  |
| <i>Val</i>                                                           |        |        |
| a                                                                    | -57.9% | -68.1% |
| b                                                                    | 78.9%  | 60.9%  |
| c                                                                    | -22.8% | -39.2% |
| d                                                                    | 93.0%  | 89.6%  |

<sup>a</sup> Enantiomeric excess determination of test samples of  $\alpha$ -amino acid through UV-vis measurements, and *ee* calibration curves made for each amino acid using receptor  $[Cu^{II}((R,R)-1)]^{2+}$ . CAS (10  $\mu$ M),  $Cu(OTf)_2$  (200  $\mu$ M), (R,R)-1 (2.5 mM), and a mixture of L- and D-amino acid (different concentrations of amino acids were used, refer to **Table S-3**) were mixed and diluted to 2 mL with buffered 1:1



MeOH:H<sub>2</sub>O.

f) Test Samples Analyzed on a UV-vis Spectrophotometer using Receptor [Cu<sup>II</sup>((R,R)-2)]<sup>2+</sup>.

**Table S-6.** Enantiomeric excess determination of test samples by analysis using [Cu<sup>II</sup>((R,R)-2)]<sup>2+</sup> through UV-vis measurements.

| Amino Acids <i>ee</i> (Actual) <i>ee</i> (Experimental) <sup>a</sup> |         |        |
|----------------------------------------------------------------------|---------|--------|
| <i>Ala</i>                                                           |         |        |
| a                                                                    | 0.0%    | -17.6% |
| b                                                                    | 33.3%   | 68.2%  |
| c                                                                    | 100.0%  | 66.4%  |
| d                                                                    | -33.3%  | -37.5% |
| <i>Ser</i>                                                           |         |        |
| a                                                                    | -100.0% | -90.8% |
| b                                                                    | 59.9%   | 82.6%  |
| c                                                                    | 19.9%   | 13.9%  |
| d                                                                    | -60.1%  | -73.3% |
| <i>Val</i>                                                           |         |        |
| a                                                                    | 20.0%   | 19.0%  |
| b                                                                    | -20.0%  | -6.8%  |
| c                                                                    | 60.0%   | 67.5%  |
| d                                                                    | -60.0%  | -60.3% |

<sup>a</sup> Enantiomeric excess determination of test samples of  $\alpha$ -amino acid through UV-vis measurements, and *ee* calibration curves made for each amino acid using receptor [Cu<sup>II</sup>((R,R)-2)]<sup>2+</sup>. CAS (10  $\mu$ M), Cu(OTf)<sub>2</sub> (105  $\mu$ M), (R,R)-2 (8.8 mM), and a mixture of L- and D-amino acid (different concentrations of amino acids were used, refer to **Table S-4**) were mixed and diluted to 2 mL with buffered 1:1 MeOH:H<sub>2</sub>O.

- (1) Folmer-Andersen, J. F.; Lynch, V. M.; Anslyn, E. V. *J. Am. Chem. Soc.* **2005**, *127*, 7986-7987.
- (2) Mimoun, H.; de Laumer, J. Y.; Giannini, L.; Scopelliti, R.; Floriani, C. *J. Am. Chem. Soc.* **1999**, *121*, 6158-6166.
